# Supplementary material for: Bioactive Sr(II)/Chitosan/Poly(ε-caprolactone) Scaffolds for Craniofacial Tissue Regeneration. In Vitro and In Vivo Behavior
Source: PubMed Central journal article supplement (PMC6415099; doi:10.3390/polym10030279), 2018-03-07
Supplement: polymers-10-00279-s001.pdf [file polymers-10-00279-s001.pdf]

# Supporting Information

**Bioactive Sr(II) loaded chitosan/PCL scaffolds for bone tissue regeneration.  
Biphasic scaffolds for the bioactive regeneration of bone tissue**

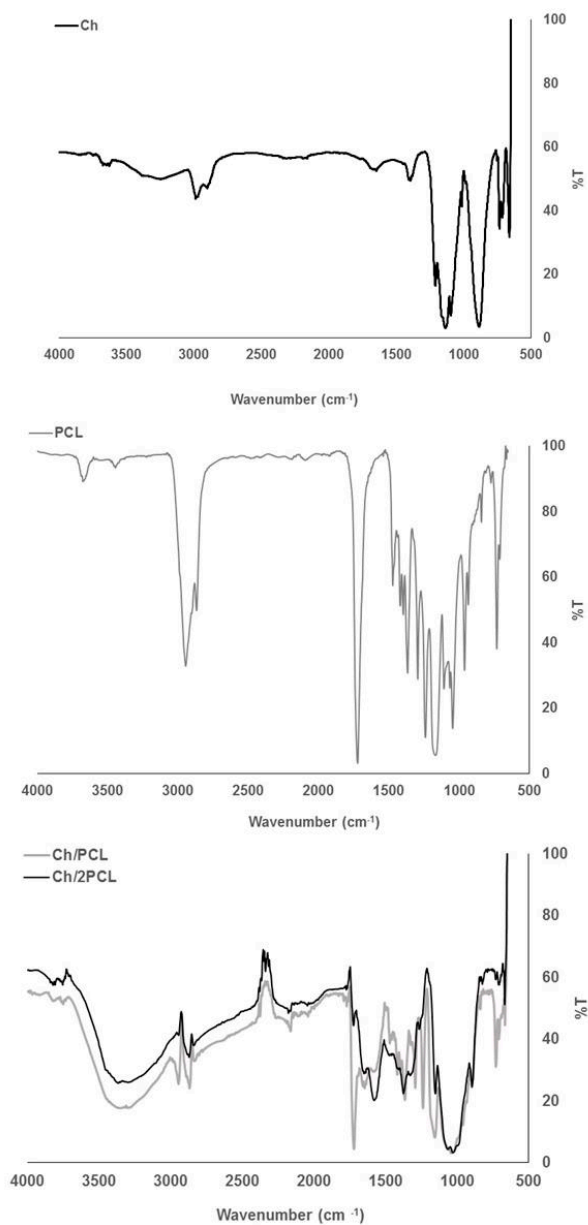

**Figure S1.** ATR-FTIR spectra of pure Ch and PCL and Ch/2PCL and Ch/PCL membranes. Ch: chitosan; PCL: poly(ε-caprolactone).

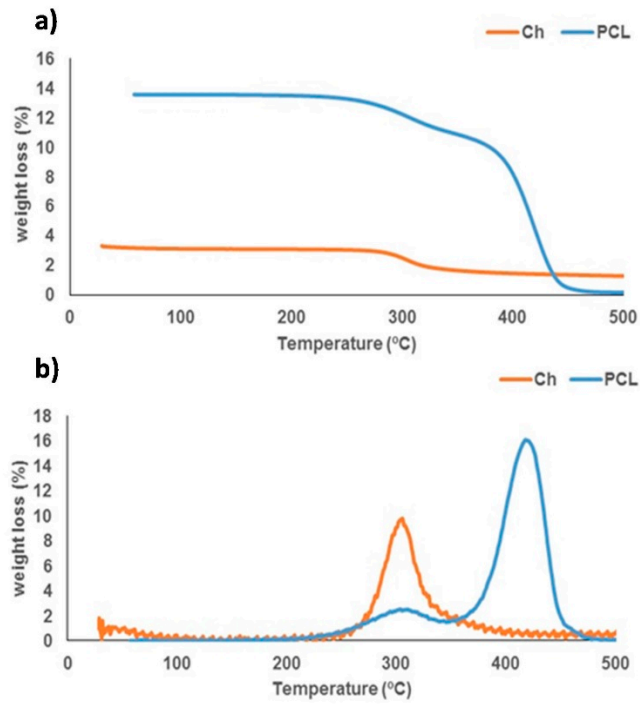

**Figure S2.** TGA (Termogravimetric analysis) (a) and DTG (Derivative Thermogravimetric analysis). (down) of pure Ch and PCL. Ch: chitosan; PCL: poly( $\epsilon$ -caprolactone).

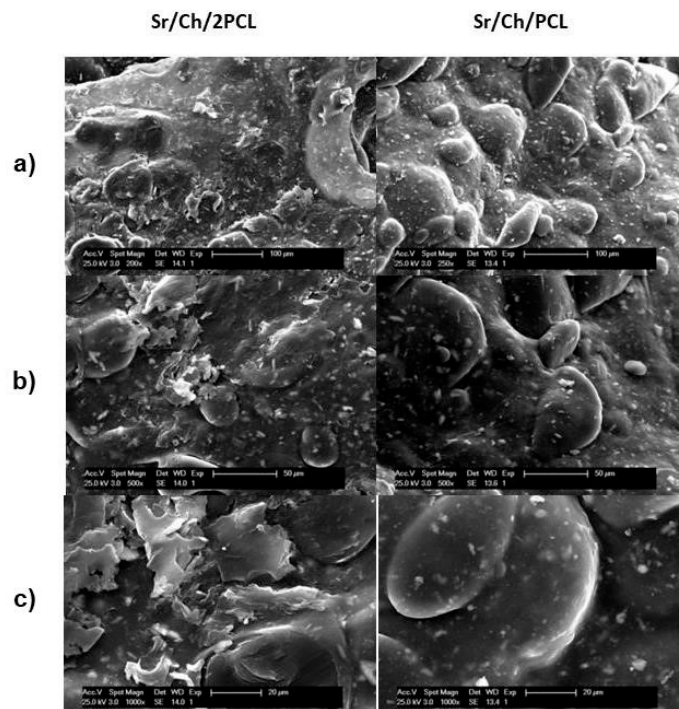

**Figure S3.** SEM images of Sr(II) membranes after 30 d immersion in PBS buffer at 37 °C. a) 200x; b) 500x; c) 1000x. Ch: chitosan; PCL: poly( $\epsilon$ -caprolactone).

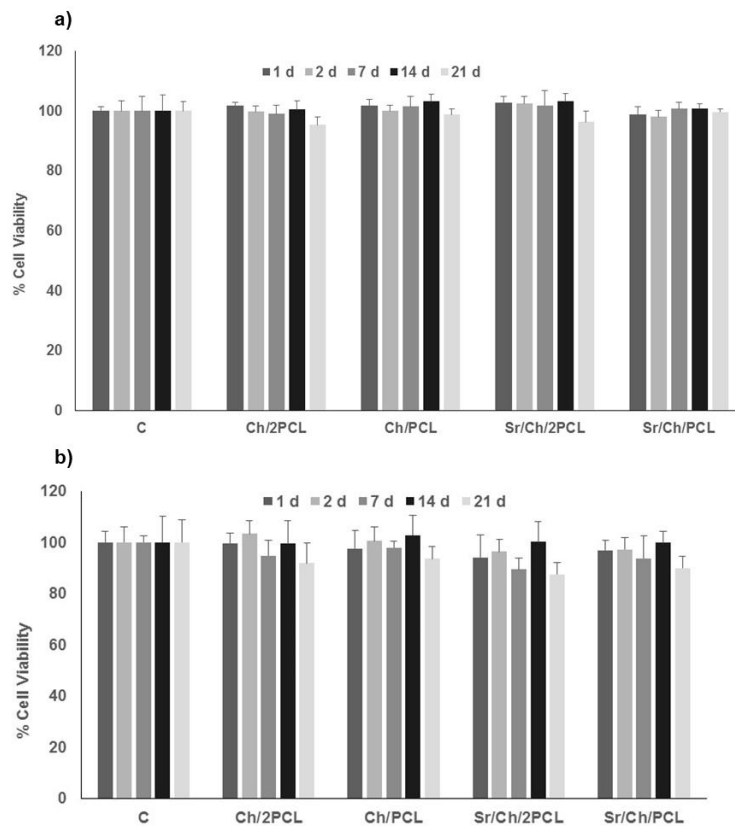

**Figure S4.** In vitro cytotoxicity results of blank and Sr (II) membranes using MG-63 cells (a) and hBMSCs (b). Results are given as mean  $\pm$  sd ( $n = 5$ ). Ch: chitosan; PCL: poly( $\epsilon$ -caprolactone).

**Table S1.** DTG (Derivative Thermogravimetric analysis) results of pure PCL (poly( $\epsilon$ -caprolactone), chitosan (Ch), blank and Sr(II) membranes.

| Sample     | $T_{\max 1}$ ( $^{\circ}\text{C}$ ) | $T_{\max 2}$ ( $^{\circ}\text{C}$ ) |
|------------|-------------------------------------|-------------------------------------|
| Ch         | 287                                 | -                                   |
| PCL        | 307                                 | 419                                 |
| Ch/2PCL    | 271                                 | 416                                 |
| Ch/PCL     | 290                                 | 420                                 |
| Sr/Ch/2PCL | 282                                 | 410                                 |
| Sr/Ch/PCL  | 286                                 | 418                                 |
